# Supplementary material for: In vivo genome-wide analysis of multiple tissues identifies gene regulatory networks, novel functions and downstream regulatory genes for Bapx1 and its co-regulation with Sox9 in the mammalian vertebral column
Source: PubMed Central journal article supplement (PMC4302147; doi:10.1186/1471-2164-15-1072), 2014-12-05

Supplementary Figure 1

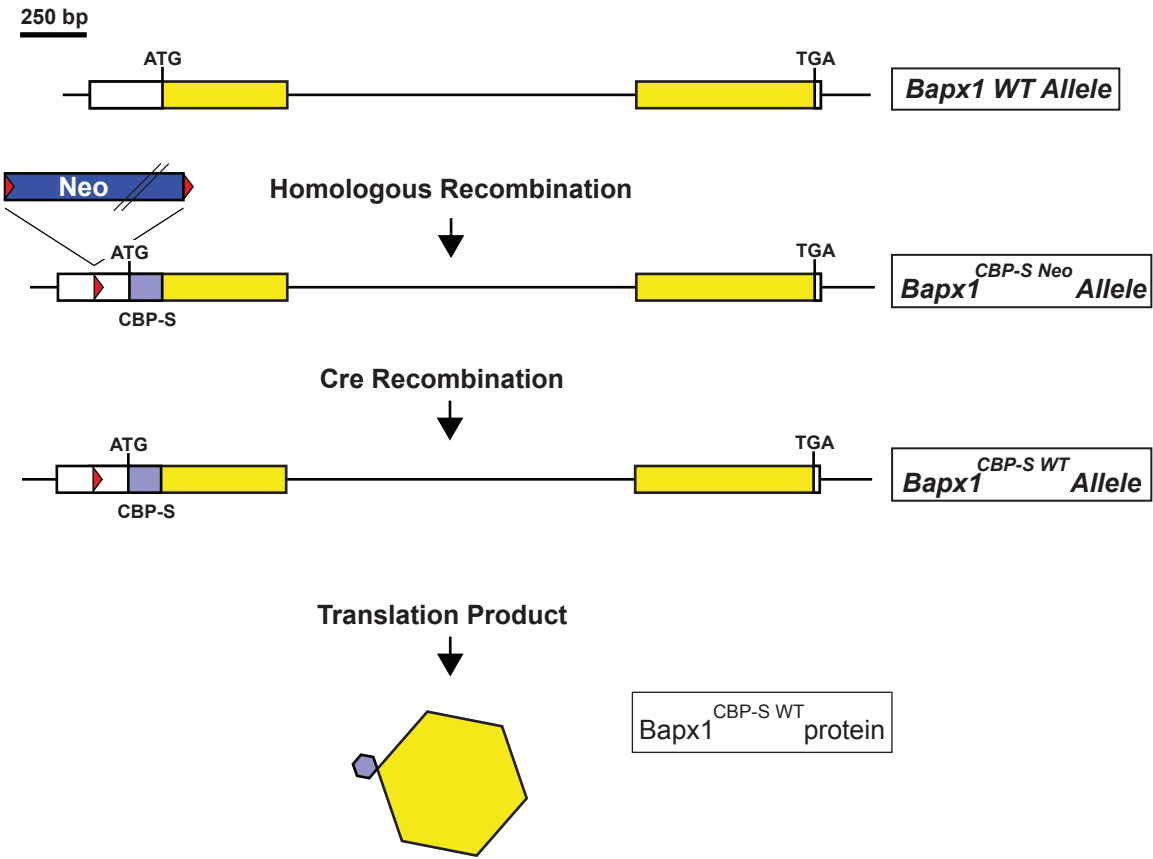

Supplement: 12864_2014_6852_MOESM4_ESM.pdf [file 12864_2014_6852_MOESM4_ESM.pdf]
